# Supplementary material for: Development and Verification of Postural Control Assessment Using Deep-Learning-Based Pose Estimators: Towards Clinical Applications
Source: Hindawi journal article supplement (doi:10.1155/2022/6952999), 2022-11-30
Supplement: f1 [file 6952999.f1.pdf]

## Supplementary materials

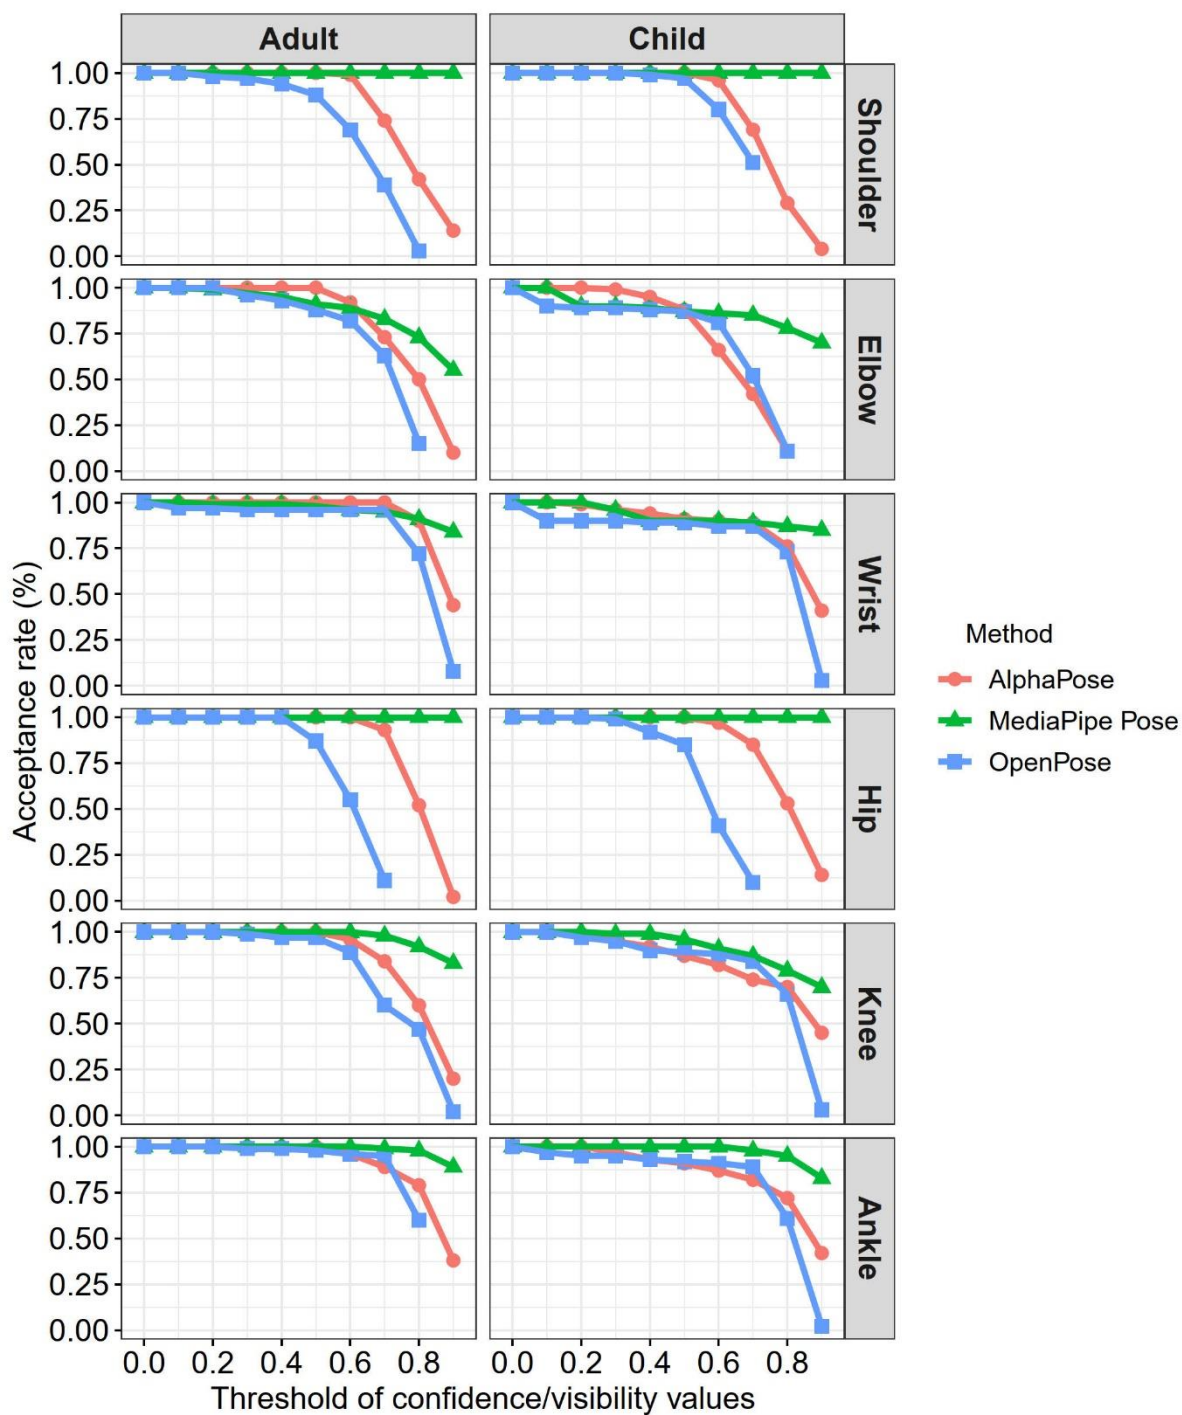

**Figure S1. Acceptance rate of each pose estimation method for each keypoint.**

*Note.* Error bars indicate standard error.

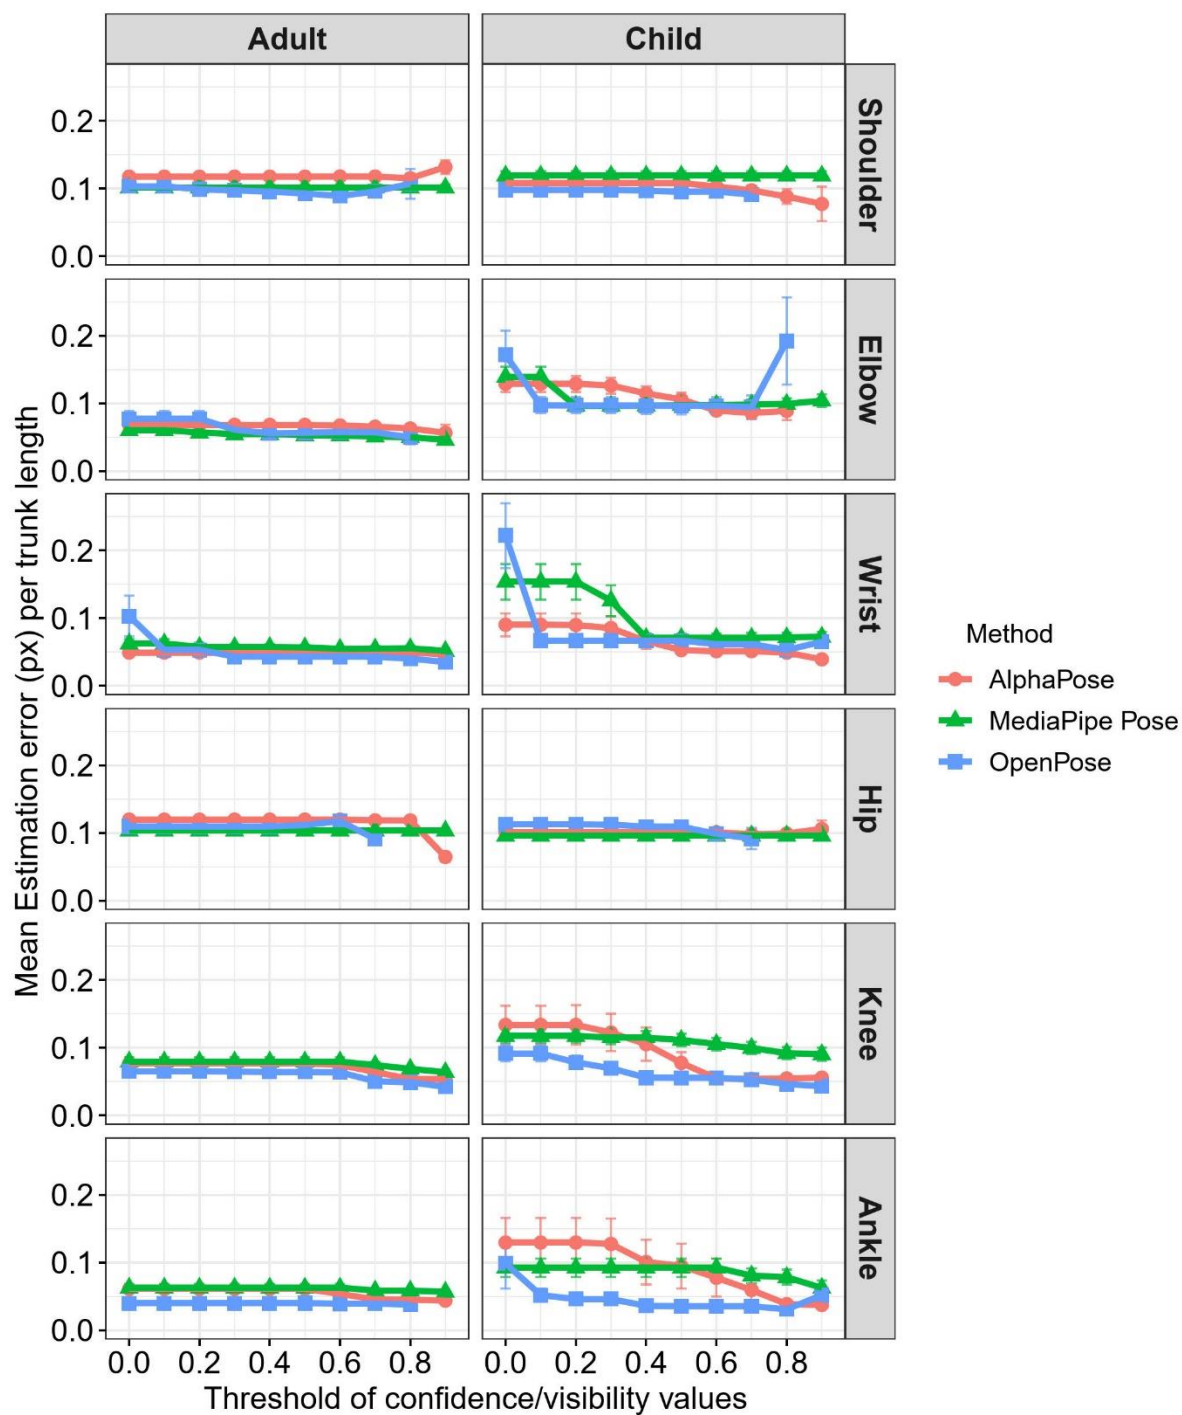

**Figure S2. Estimation error distance of each pose estimation method for each keypoint.**

*Note.* Error bars indicate standard error.

**Table S1. List of abbreviations**

---

|       |                                                              |
|-------|--------------------------------------------------------------|
| AG    | antigravity score                                            |
| AIC   | Akaike's Information Criterion                               |
| EMA   | exponentially weighted moving average                        |
| EWMSD | exponentially weighted moving standard deviation             |
| FPS   | frame per second                                             |
| JPAN  | Japanese Playful Assessment for Neuropsychological Abilities |
| OT    | occupational therapist                                       |
| SPB   | static postural balance score                                |
| XAI   | explainable artificial intelligence                          |

---
